# Supplementary material for: Uncertainty of continuous ∆CO-based ∆ffCO 2 estimates derived from 14 C flask and bottom-up ∆CO / ∆ffCO 2 ratios
Source: Copernicus journal article supplement (doi:10.5194/egusphere-2023-1237), 2023-06-14
Supplement: Supplementary file [file egusphere-2023-1237-AC1-supplement.pdf]

We want to thank the anonymous referee for the review of our manuscript. Our replies are marked in blue.

The manuscript by Maier et al. presented measurements of  $^{14}\text{CO}_2$  and CO in flasks collected at two sites, and the purpose of these measurements is to assess the ratio and the associated uncertainties of CO and fossil-fuel sourced CO<sub>2</sub> ( $\Delta\text{ffCO}_2$ ). The latter, proposed by the authors, can be further used to estimate  $\Delta\text{ffCO}_2$  based on CO measurements which is easy doing. The idea behind this study appears to be that since C-14 analysis is difficult and there is a need of alternatives to estimate  $\Delta\text{ffCO}_2$ , while CO that is produced mainly from the same fossil fuel combustion source can serve as a tracer to estimate  $\Delta\text{ffCO}_2$  as long as the ratio of CO to  $\Delta\text{ffCO}_2$  can be constrained.

I would say this is a fair theory, however, the manuscript is more like a measurement report rather than a research article. This is my first impression of reading this manuscript. The second, as the authors indicated in the manuscript, there are many issues regarding the ratio based on flask measurements, so as the ability of this ratio used to predict  $\Delta\text{ffCO}_2$  from CO measurements. This whole idea has a few confusions or flaws that leads to little confidence for its applications. I list my major concerns as follows:

We regret that we have not succeeded in explaining the relevance of our study to the broader community. As we state in the introduction, the basic idea of using CO as a proxy for  $\text{ffCO}_2$  is more than 20 years old. Even older is the realisation that there will be no semi-continuous measurements of the direct  $\text{ffCO}_2$  tracer  $\Delta^{14}\text{CO}_2$  in atmospheric observing networks for the foreseeable future. As we discuss in the paper, CO is not a perfect  $\text{ffCO}_2$  proxy for many reasons. Therefore, we consider it the primary goal of our study to emphasise the shortcomings of the CO-proxy approach clearly. This includes showing that the use of the CO proxy requires calibration by  $^{14}\text{C}$  measurements to achieve the necessary precision. Despite all the difficulties and deficits of the CO-proxy-based  $\text{ffCO}_2$  estimation, we demonstrate in this paper and in the companion paper by Maier et al. (2023) the great potential of this method. We understand that due to our comprehensive and in-depth analysis of the problems of the CO-proxy, the impression of the measurement report may arise. However, it is precisely this detailed and dedicated investigation of the CO-proxy approach that sets this publication apart from its predecessors and makes future users of the CO-proxy approach, whether for in-situ or remote sensing approaches, aware of its potential and shortcomings.

1). The authors point out the disadvantage of using C-14 measurement to assess  $\Delta\text{ffCO}_2$ , high cost, low coverage, and etc., and thus there is a need of independent tracers that are easy monitoring. The proposed tracer is CO. But in order to use CO to estimate  $\Delta\text{ffCO}_2$  in a site or regions, one has to first measure enough C-14 data to build a robust CO/ $\Delta\text{ffCO}_2$  ratio? This is sort of a loop, if there is already C-14 measurements, isn't that can be directly used to calculate  $\Delta\text{ffCO}_2$ ? Although CO measurements can be continuous, so as the derived  $\Delta\text{ffCO}_2$  with a known CO/ $\Delta\text{ffCO}_2$  ratio, would continuous  $\Delta\text{ffCO}_2$  record be offering significantly more valuable information than discrete (e.g., daily or hourly average)  $\Delta\text{ffCO}_2$  measurements?

As mentioned above, using  $^{14}\text{CO}_2$  measurements is the most direct way to estimate  $\Delta\text{ffCO}_2$  concentrations. However, the sparse  $^{14}\text{CO}_2$  observations lead to a small amount of  $\Delta\text{ffCO}_2$  estimates, which could be used in inverse models to infer  $\text{ffCO}_2$  emissions. The question is then: is the amount of  $\Delta\text{ffCO}_2$  data enough for getting robust and data-driven inversion results? This is exactly what we investigated in the companion paper (Maier et al., 2023), which followed up this study. It turned out, that we indeed get no robust  $\text{ffCO}_2$  emission estimates for the surroundings of Heidelberg if we use the  $^{14}\text{C}$ -based  $\Delta\text{ffCO}_2$  estimates from the Heidelberg flasks. This can mainly be explained by the very heterogenic distribution of the  $\text{ffCO}_2$  sources around Heidelberg (including several large point sources) and the shortcomings of the transport model in accurately simulating  $\text{ffCO}_2$  concentrations for individual (afternoon) hours. In contrast, the continuous Heidelberg CO-based  $\Delta\text{ffCO}_2$  estimates, which we derived in this study, yield robust and data-driven inversion results that could be used to investigate the effect of the Corona restrictions and to validate the seasonal cycle of the TNO  $\text{ffCO}_2$  emission inventory in the main footprint of Heidelberg. Thus, the continuous CO-based  $\Delta\text{ffCO}_2$  record indeed yields more valuable information than the discrete  $^{14}\text{C}$ -based  $\Delta\text{ffCO}_2$  estimates from flasks for this urban region around Heidelberg and at the present time when the traffic and heating sectors show here similar CO/ $\text{ffCO}_2$  emission ratios. Of course, if the  $^{14}\text{C}$ -based  $\Delta\text{ffCO}_2$  had a similar temporal resolution like the CO-based  $\Delta\text{ffCO}_2$ , the information content of the  $^{14}\text{C}$ -based  $\Delta\text{ffCO}_2$  would be higher than that of the CO-based  $\Delta\text{ffCO}_2$ . However, as this is not (yet) the case, we conclude that the usage of CO-based  $\Delta\text{ffCO}_2$  to infer  $\text{ffCO}_2$  emissions could be a valuable approach for other (urban) sites.

For such a CO-based  $\Delta\text{ffCO}_2$  inversion, it is essential to have a reliable quantification of the uncertainties of the CO-based  $\Delta\text{ffCO}_2$  estimates and an investigation of potential seasonal or diurnal cycles in the  $\Delta\text{CO}/\Delta\text{ffCO}_2$  ratios. Both aspects are treated in detail in our present study, which is why it forms the basis for CO-based  $\Delta\text{ffCO}_2$  inversions.

2) I am not sure if this is the authors' idea: once a robust CO/ $\Delta\text{ffCO}_2$  ratio was available, then perhaps this ratio is able to apply to other locations or the same location but at a different time? This is my impression of reading the manuscript, and this is perhaps the most (if not only) significance of establishing the ratio. However, as the measurement reports from the two sites indicates, the CO/ $\Delta\text{ffCO}_2$  ratio are different among these sites, and there are also large temporal variations. This causes doubts on the ability of the ratio to be applied to period or regions without C-14 but only CO observations. In fact, due to spatial and temporal variations in the use of fossil fuel energy, as well as the spatial and temporal variations in other sources/factors that could influence the production and atmospheric removal of CO, there is a doubt that whether the CO/ $\Delta\text{ffCO}_2$  ratio can stay relatively constant with time and space.

We agree, the  $\Delta\text{CO}/\Delta\text{ffCO}_2$  can show large spatial and temporal differences due to the spatiotemporal variability of the CO/ $\text{ffCO}_2$  emission ratios and/or non-fossil CO contributions. This is also what we found in our study: the average  $\Delta\text{CO}/\Delta\text{ffCO}_2$  ratio in Heidelberg is lower compared to that at OPE. That's why we do not recommend to apply a single  $\Delta\text{CO}/\Delta\text{ffCO}_2$  ratio for different sites or times, if it is not validated by  $^{14}\text{C}$  measurements at the respective sites. In our study, we discuss how many  $^{14}\text{C}$  measurements should be performed to get robust  $\Delta\text{CO}/\Delta\text{ffCO}_2$  ratios, which can then be used to construct a CO-based  $\Delta\text{ffCO}_2$  record with high temporal resolution.

Moreover, our comparison of the observed ratios with inventory-based ratios from TNO clearly reveals that the  $\Delta\text{CO}/\Delta\text{ffCO}_2$  ratios should be calibrated with  $^{14}\text{C}$  measurements to avoid large biases in the CO-based  $\Delta\text{ffCO}_2$  estimates. Ongoing  $^{14}\text{C}$  measurements are therefore a prerequisite for monitoring changes in future  $\Delta\text{CO}/\Delta\text{ffCO}_2$  ratios and continuing to apply the CO proxy approach. This information is also relevant for studies combining satellite-based CO observations and inventory-based CO/ $\text{ffCO}_2$  emission ratios to derive  $\text{ffCO}_2$  emissions.

The first concern emphasizes that no matter what one needs to measure C-14, and the second indicates the established ratio is probably not able to fulfil the intended tasks. As such, the scientific significance of these measurements is somewhat weak, and this is why I suggested that this manuscript is more like a measurement report.

Unfortunately, it is not straightforward to calculate  $\Delta\text{ffCO}_2$  concentrations, which then could be used to derive top-down  $\text{ffCO}_2$  emission estimates. If there were continuous  $^{14}\text{C}$  measurements with high spatiotemporal coverage and low uncertainty, we would hardly need to think about using CO as a tracer for  $\text{ffCO}_2$ . However, this is at least not yet the case. Thus, the CO proxy approach is a way to bridge the gap between more reliable but sparse  $^{14}\text{C}$ -based  $\Delta\text{ffCO}_2$  estimates with temporal information derived from CO.

With this in mind, we are convinced that our present study is important and has a scientific significance. We want to summarize here the main points, why we do not think that this study is just a measurement report:

1. In addition to quantifying the uncertainties of the CO-based  $\Delta\text{ffCO}_2$ , we conducted a synthetic data experiment to characterize and interpret the cause of these uncertainties. From this study, we were able to draw conclusions about the impact of the spatiotemporal variability of the CO/ $\text{ffCO}_2$  emission ratios on the CO-based  $\Delta\text{ffCO}_2$  uncertainties at an urban and a rural site.
2. We used the STILT model to also simulate  $\Delta\text{CO}/\Delta\text{ffCO}_2$  ratios for both sites. We carefully compared the simulated ratios with our measurements and demonstrate that there can be substantial biases. Our study suggests that the TNO inventory may underestimate the CO/ $\text{ffCO}_2$  emission ratios in the Rhine Valley. A more detailed investigation (in the revised version of the manuscript) reveals that especially the CO/ $\text{ffCO}_2$  emissions from the TNO heating sector might be too low in the main footprint of Heidelberg. Such studies are important to improve the emission inventories.
3. By performing a bootstrapping approach, we provide a rough estimate on how many  $^{14}\text{C}$  flasks should be collected at other sites to obtain robust  $\Delta\text{CO}/\Delta\text{ffCO}_2$  ratios, which can then be used to derive CO-based  $\Delta\text{ffCO}_2$  concentrations at those sites. This is an essential information if CO-based  $\Delta\text{ffCO}_2$  data is to be used in inverse models to estimate  $\text{ffCO}_2$  emissions. In our follow-up study, we show that the CO-based  $\Delta\text{ffCO}_2$  data from Heidelberg lead to robust  $\text{ffCO}_2$  emission estimates, which could be used to validate the seasonal cycle of the TNO emission inventory.

From that we argue that our study has enough scientific significance to be published as a research article.

In addition, I have some technical suggestions that the authors can consider to use or not:

1) in the method part, please state more clearly how other sources especially the biomass burning source of CO is treated to get  $\Delta\text{CO}$ ; This includes the modeling of inventory based ratio.

The TNO inventory includes CO emissions from agricultural waste burning, i.e. the burning of crop residues based on a 10 year climatology. However, CO emissions from forest fires are not included. These emissions are erratic and can be obtained from e.g. the Copernicus Global Fire assimilation system (GFAS). For the central European region, forest fires are not a dominant source of CO. We clarified this in the manuscript. (p. 7, l. 205-207)

2) In 2.2.1., the defined  $R_{\text{flask}}$  is in fact not used but instead  $\Delta\text{CO}/\Delta\text{ffCO}_2$  in follow-up results and discussion. I suggest to keep constant throughout the manuscript.

Thank you for this hint. We replaced  $R_{\text{flask}}$  by  $\Delta\text{CO}/\Delta\text{ffCO}_2$  in our manuscript.

3) Figure 3b, could not understand how real flask measurements can be plotted in the figure, the X-axis is measurements, while the Y-axis is synthetic data which is not scaled to real measurements.

The real and synthetic data share the same X-axis and Y-axis. We labelled the X-axis with " $^{14}\text{C}$ -based  $\Delta\text{ffCO}_2$ " because it refers to the  $^{14}\text{C}$ -based  $\Delta\text{ffCO}_2$  observations (in case of the real observations, i.e. the black and grey dots) and to the error-prone synthetic  $\Delta\text{ffCO}_2$  data (in case of the synthetic data, i.e. the red and orange dots), which should mimic the variability of the  $^{14}\text{C}$ -based  $\Delta\text{ffCO}_2$  observations. Similarly, the Y-axis with label " $\Delta\text{CO}$ -based  $\Delta\text{ffCO}_2$ " refers to the  $\Delta\text{CO}$ -based  $\Delta\text{ffCO}_2$  observations as well as to the synthetic  $\Delta\text{CO}$ -based  $\Delta\text{ffCO}_2$  data, which were constructed by dividing the synthetic  $\Delta\text{CO}$  data by a constant  $\Delta\text{CO}/\Delta\text{ffCO}_2$  ratio of 8.44 ppb/ppm. We tried to make this clearer in the caption of Fig. 3.

#### References:

Maier, F. M., Rödenbeck, C., Levin, I., Gerbig, C., Gachkivskiy, M., and Hammer, S.: Potential of  $^{14}\text{C}$ -based versus  $\Delta\text{CO}$ -based  $\Delta\text{ffCO}_2$  observations to estimate urban fossil fuel  $\text{CO}_2$  ( $\text{ffCO}_2$ ) emissions, EGU sphere [preprint], <https://doi.org/10.5194/egusphere-2023-1239>, 2023.
